# The Journal of Neuropsychiatry and Clinical Neurosciences

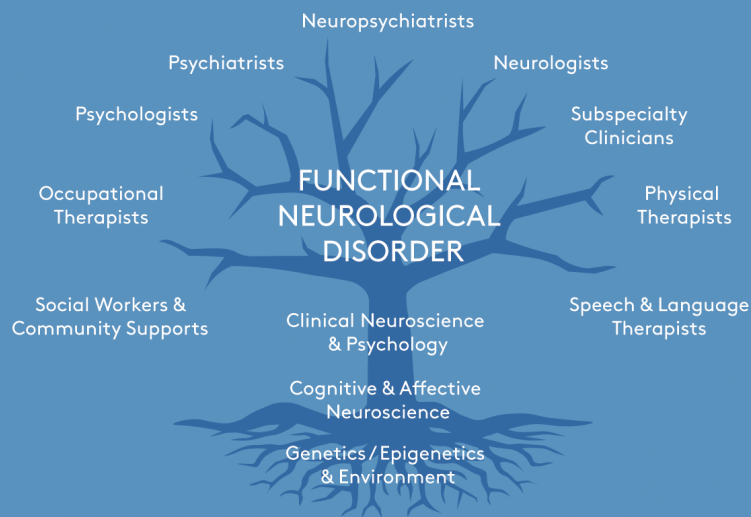

## Special Issue: Functional Neurological Disorder

**Guest Editors:** David L. Perez, M.D., M.M.Sc., Selma Aybek, M.D., Timothy R. Nicholson, M.D., Ph.D., Kasia Kozłowska, M.B.B.S., Ph.D., and W. Curt LaFrance Jr., M.D., M.P.H.

Functional Neurological (Conversion) Disorder:  
A Core Neuropsychiatric Disorder

Outcome Measures for Functional Neurological Disorder:  
A Review of the Theoretical Complexities

Functional Motor Symptoms in Parkinson's Disease  
and Functional Parkinsonism: A Systematic Review

Evaluation of LiNES: A New Measure of Trauma, Negative Affect,  
and Relationship Insecurity Over the Life Span in Persons With FND

What Is the Role of a Specialist Assessment Clinic for FND?  
Lessons From Three National Referral Centers

Official Journal of the American Neuropsychiatric Association  
[neuro.psychiatryonline.org](http://neuro.psychiatryonline.org)
