# Submit to *The Journal of Neuropsychiatry and Clinical Neurosciences*

As the official Journal of the American Neuropsychiatric Association, the premier national organization of clinicians and investigators in the interdisciplinary areas of neuropsychiatry, behavioral neurology, neuropsychology, and the cognitive neurosciences, *The Journal of Neuropsychiatry and Clinical Neurosciences* is dedicated to publishing the work of renowned researchers, clinicians, and educators to advance the care of patients. *The Journal of Neuropsychiatry and Clinical Neurosciences* publishes peer-reviewed articles addressing critical subjects such as Alzheimer's disease, traumatic brain injury, Parkinson's disease, epilepsy, and seizure disorders, and is devoted to reporting discoveries in clinical neuroscience that are relevant to understanding the brain-based disorders of patients.

Contributions of our content to the literature are reflected in the *Journal's* h-index. According to Web of Science, the lifetime (1989-present) h-index of JNCN is 91.

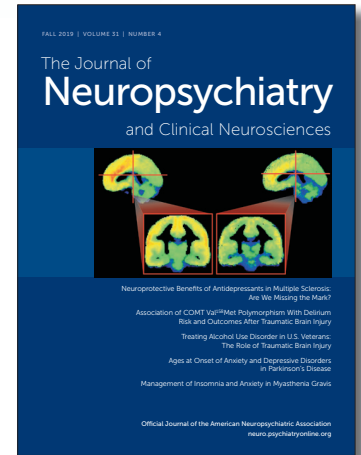

In 2019, our most discussed papers included:

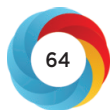

## Predisposing Risk Factors for Functional Limb Weakness: A Case-Control Study

Article in *The Journal of Neuropsychiatry and Clinical Neurosciences*, August 2019

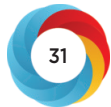

## Hiding in Plain Sight: Functional Neurological Disorders in the News

Article in *The Journal of Neuropsychiatry and Clinical Neurosciences*, October 2019

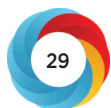

## The Neural Correlates of Impaired Self-Monitoring Among Individuals With Neurodegenerative Dementias

Article in *The Journal of Neuropsychiatry and Clinical Neurosciences*, July 2019

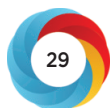

## Outcome Measures for Functional Neurological Disorder: A Review of the Theoretical Complexities

Article in *The Journal of Neuropsychiatry and Clinical Neurosciences*, December 2019

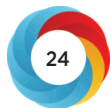

## The Last Witness to Creation: A Case of Charles Bonnet Syndrome

Article in *The Journal of Neuropsychiatry and Clinical Neurosciences*, April 2019

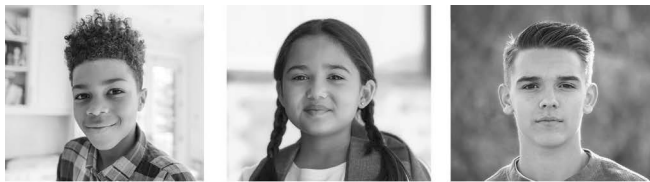

One of these kids didn't try their best. Can you tell which one?

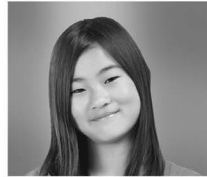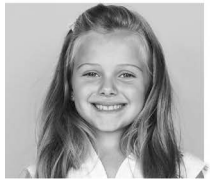

Let the PdPVTs give you the confidence to identify valid test performance.

Assess **performance validity** in youth in just **3-5 minutes** with five stand-alone tests

MHS<sup>®</sup>  
ASSESSMENTS

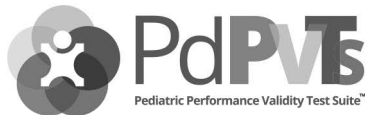

Pediatric Performance Validity Test Suite™

MHS.com/PdPVTs

## Textbook of Traumatic Brain Injury, Third Edition

Edited by Jonathan M. Silver, M.D.,  
Thomas W. McAllister, M.D.,  
and David B. Arciniegas, M.D.

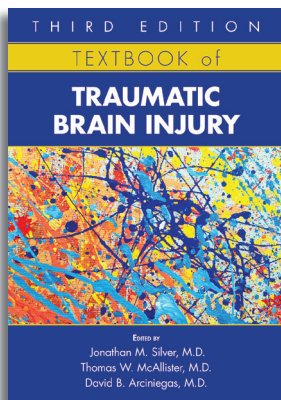

The *Textbook of Traumatic Brain Injury* is a must-read for all of those working in any of the multitude of disciplines that contribute to the care and rehabilitation of persons with brain injury. This new volume is also a potentially useful reference for policymakers in both the public and private sectors.

2019 • 985 pages • ISBN 978-1-61537-112-9 • Hardcover • \$195.00 • Item #37112  
2019 • 985 pages • ISBN 978-1-61537-247-8 • eBook • \$156.00 • Item #37247

AMERICAN  
PSYCHIATRIC  
ASSOCIATION  
PUBLISHING

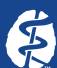

www.appi.org  
Email: appi@psych.org  
Phone: 1-800-368-5777

AH1902A

PSYCHIATRIC  
NEWS

BRIEF

## Enable Psychiatric News Brief

With the American Psychiatric Association's new flash briefing, *Psychiatric News Brief*, you can now listen to synopses of curated articles from *Psychiatric News*. Simply enable this skill and you can listen anytime you choose throughout your day by just saying "Alexa, what's my flash briefing" or "Alexa, tell me what's new".

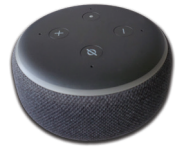

Flash briefing is a customizable Amazon skill that includes updates from your favorite content services. When you say, "Alexa, what's my flash briefing?" or "Alexa, what's the news," you'll hear updates from any organization that you have enabled.

Go to [psychnews.psychiatryonline.org/alexa](https://psychnews.psychiatryonline.org/alexa) to sign up now!

AMERICAN  
PSYCHIATRIC  
ASSOCIATION  
PUBLISHING

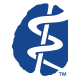

www.appi.org  
Email: appi@psych.org  
Phone: 1-800-368-5777

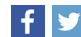

## Casebook of Neuropsychiatry

Edited by Trevor A. Hurwitz, M.B., Ch.B.,  
and Warren T. Lee, M.D., Ph.D.

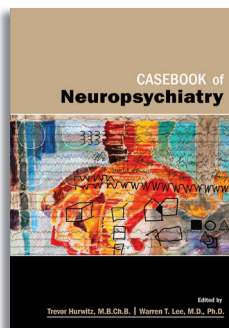

*Casebook of Neuropsychiatry* is comprised of 38 clinical cases based on real patient interactions that straddle the domains of neurology and psychiatry. The book is designed to supplement comprehensive texts by providing real-world accounts of patient presentations that clinicians are likely to encounter.

2013 • 383 pages • ISBN 978-1-58562-431-7 • Paperback  
\$83.00 • Item #62431

2013 • 383 pages • ISBN 978-1-58562-992-3 • eBook  
\$66.00 • Item #62992

AMERICAN  
PSYCHIATRIC  
ASSOCIATION  
PUBLISHING

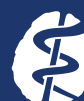

www.appi.org  
Email: appi@psych.org  
Phone: 1-800-368-5777

AH1732A
